# Supplementary material for: Mussel-inspired facile synthesis of Fe/Co-polydopamine complex nanospheres: complexation mechanism and application of the carbonized hybrid nanospheres as an efficient bifunctional electrocatalyst
Source: Royal Society of Chemistry journal article supplement (doi:10.1039/c8nj04243h), 2018-01-01
Supplement: c8nj04243h1.pdf [file c8nj04243h1.pdf]

## Electronic Supplementary Information

# Mussel-Inspired Facile Synthesis of Fe/Co-Polydopamine Complex Nanospheres: Complexation Mechanism and Application of the Carbonized Hybrid Nanospheres as an Efficient Bifunctional Electrocatalyst

Jia Ming Ang,<sup>a</sup> Bing Li,<sup>b</sup> Shibo Xi,<sup>c</sup> Yonghua Du,<sup>c</sup> Chenyang Zhao,<sup>a</sup> Junhua Kong,<sup>b</sup> Yun Zong,<sup>b</sup> Ludger Paul Stubbs,<sup>c</sup> Xuehong Lu<sup>\*a</sup>

<sup>a</sup> School of Materials Science and Engineering, Nanyang Technological University, 50 Nanyang Avenue, Singapore 639798

<sup>b</sup> Institute of Materials Research and Engineering, A\*STAR (Agency for Science, Technology and Research), 2 Fusionopolis Way, Singapore 138634

<sup>c</sup> Institute of Chemical and Engineering Sciences, A\*STAR (Agency for Science, Technology and Research), 1 Pesak Road, Jurong Island, Singapore 627833

\*Corresponding Author: [ASXHLU@ntu.edu.sg](mailto:ASXHLU@ntu.edu.sg)

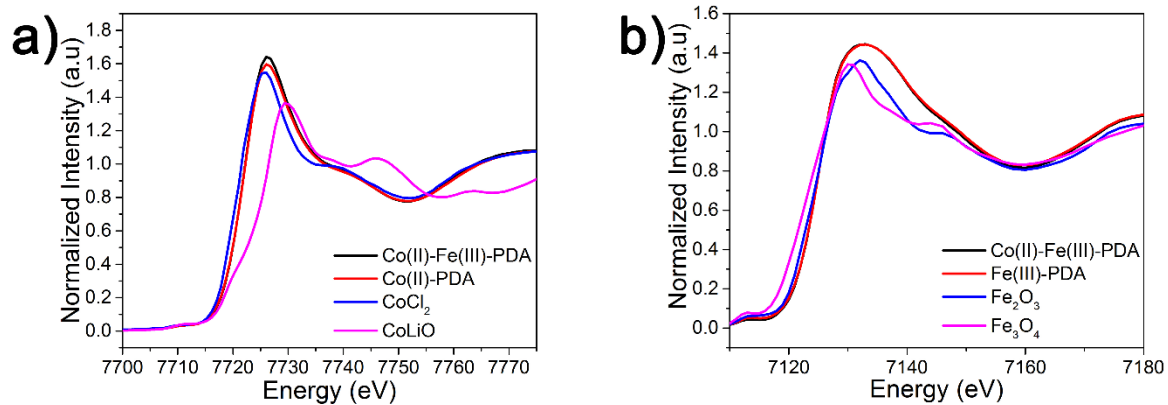

**Figure S1.** XANES spectra of Co(II)-Fe(III)-PDA, Co(II)-PDA and Fe(III)-PDA against commercially available chemicals.

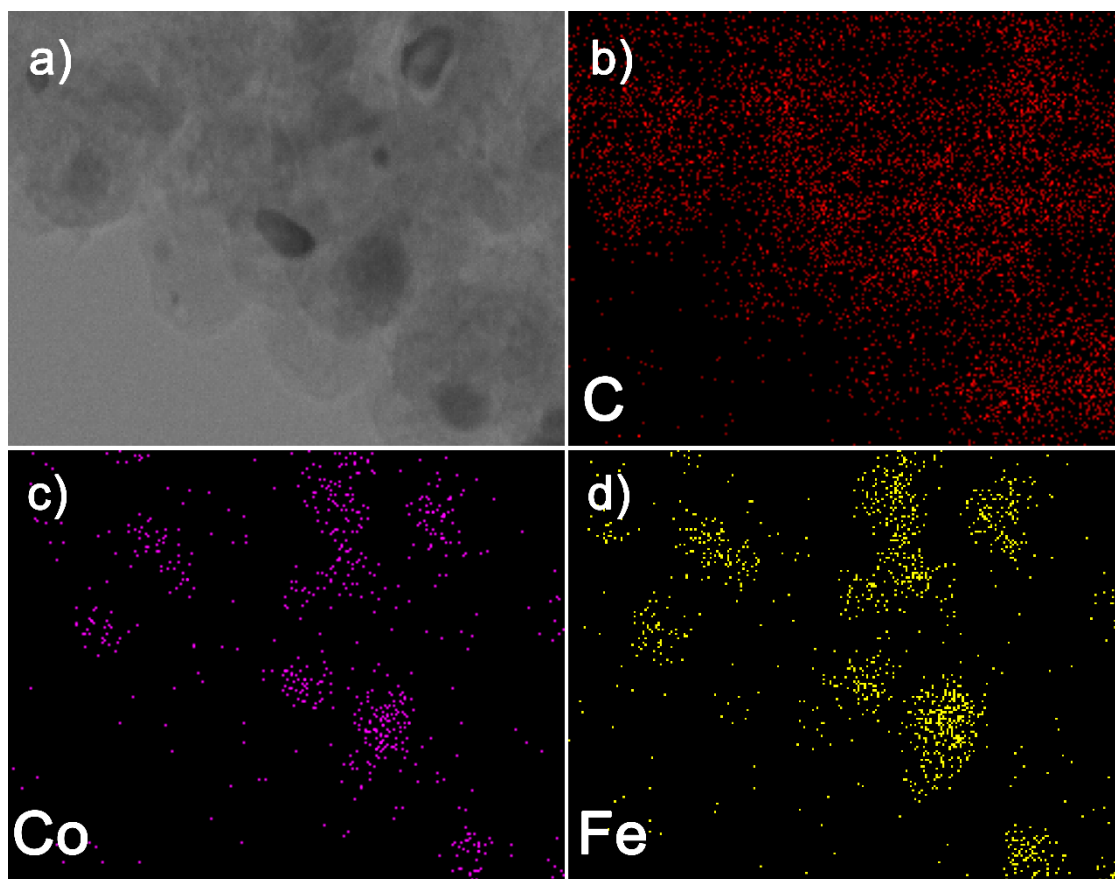

**Figure S2.** a) TEM micrograph of CoFe/C-PDA nanospheres, STEM elemental mapping for b) C, c) Co and d) Fe.

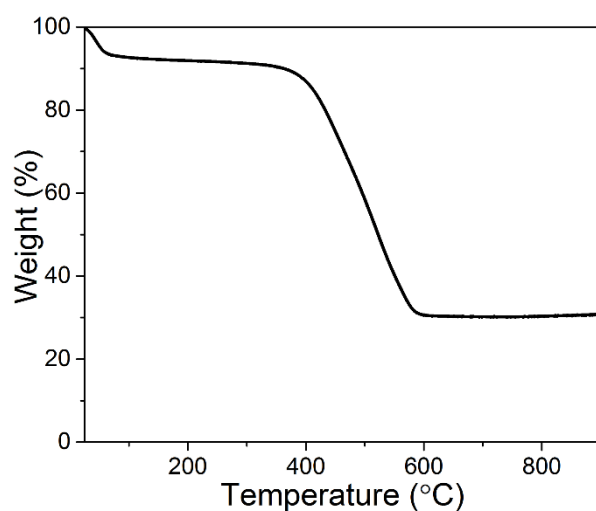

**Figure S3.** TGA curve of CoFe<sub>2</sub>O<sub>4</sub>/CoFe/C-PDA nanospheres.

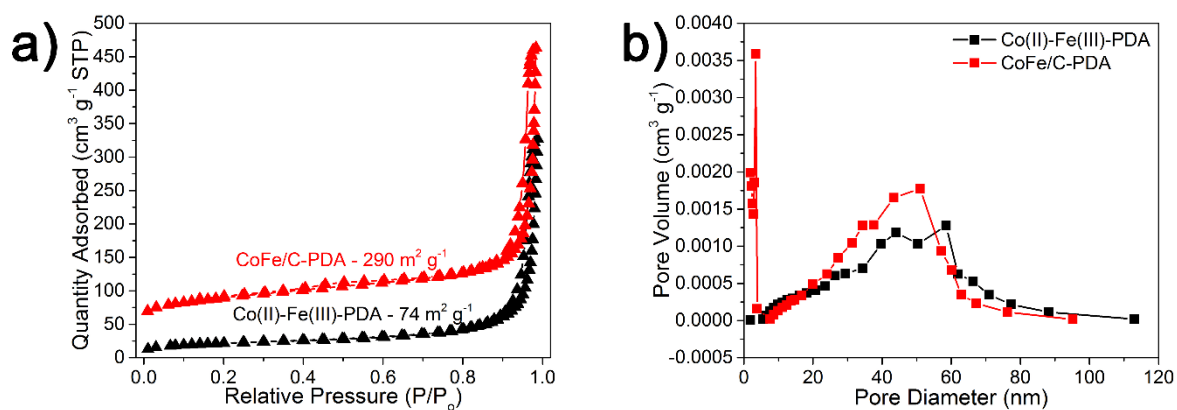

**Figure S4.** (a) Brunauer-Emmett-Teller (BET) N<sub>2</sub> isotherm curve and (b) Barrett-Joyner-Halenda (BJH) pore size distribution of Co(II)-Fe(III)-PDA and CoFe/C-PDA.

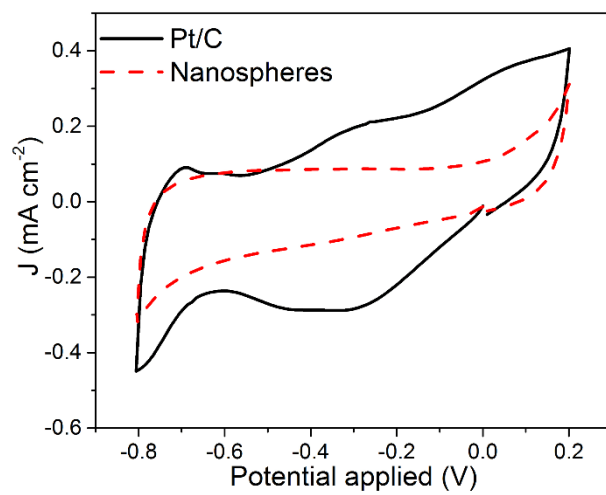

**Figure S5.** CV curves of commercial Pt/C and CoFe<sub>2</sub>O<sub>4</sub>/CoFe/C-PDA nanospheres in N<sub>2</sub>-saturated 0.1 M KOH electrolyte.
